# Supplementary material for: Intravital imaging of the murine subventricular zone with three photon microscopy
Source: PubMed Central journal article supplement (PMC9290563; doi:10.1093/cercor/bhab400), 2022-01-14
Supplement: movie_legends_bhab400.pdf [file movie_legends_bhab400.pdf]

**Movie 1**

The movie contains 512 x 512 pixel images of fluorescent signals from CTO in a P3 brain. Depth in  $\mu\text{m}$  is shown on bottom left corner. Scale bar, 50  $\mu\text{m}$ .

**Movie 2**

The movie contains fluorescent signals from CTO (red) and THG signals (green). The 3D reconstruction shows the depth from 1050  $\mu\text{m}$  to 1400  $\mu\text{m}$  in a juvenile brain. Scale bar, 100  $\mu\text{m}$ .

**Movie 3**

The movie contains fluorescence signals from CTO (red). The 3D reconstruction shows fine processes of cells at depths from 1150  $\mu\text{m}$  to 1472  $\mu\text{m}$  in a P3 brain. Scale bar, 80  $\mu\text{m}$ .

**Movie 4**

Filament tracking in a P3 brain. The 3D reconstruction shows thin lines that represent the fine basal processes of neural stem cells and the thick line represents a blood vessel. One of the processes has a direct contact with the blood vessel. Scale bar, 100  $\mu\text{m}$ .

**Movie 5**

The movie contains fluorescence signals from CTO (red). The 3D reconstruction shows the depth from 1271  $\mu\text{m}$  to 1325  $\mu\text{m}$  in a juvenile brain. Scale bar, 50  $\mu\text{m}$ .

**Movie 6**

The movie shows CTG imaging with our 3PM at U Oxford. Cells are shown from depths of from 761 to 950  $\mu\text{m}$  in a P3 brain. Scale bar, 50  $\mu\text{m}$ .
