# Supplementary material for: Intravital imaging of the murine subventricular zone with three photon microscopy
Source: PubMed Central journal article supplement (PMC9290563; doi:10.1093/cercor/bhab400), 2022-01-14
Supplement: suppl_fig_4_bhab400.pdf [file suppl_fig_4_bhab400.pdf]

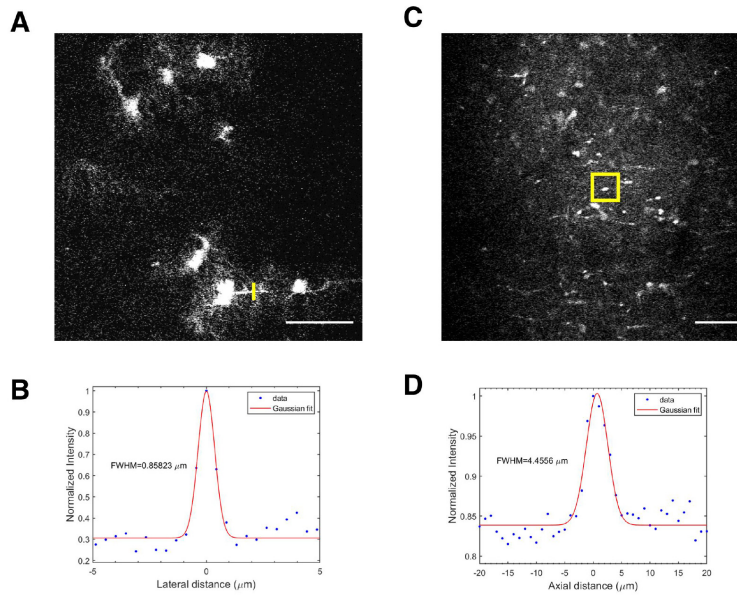

**Fig. S4 Intensity profiles of subcellular structures**

(A-B) The lateral brightness distribution of small features within the juvenile mouse brain (A) fine astrocyte processes are visible at 1039  $\mu\text{m}$  depth and the FWHM of the lateral brightness distributions (B).

(C-D) The axial brightness distribution of small features of cells corresponding with radial glia processes within the postnatal mouse brain (C) at 1371  $\mu\text{m}$  depth and the FWHM of the axial brightness distributions (D).

Scale bars represent 50  $\mu\text{m}$  in A and C.
